# Supplementary material for: Human longevity is influenced by many genetic variants: evidence from 75,000 UK Biobank participants
Source: PubMed Central journal article supplement (PMC4833145; doi:10.18632/aging.100930), 2016-03-23

1)

# UK Biobank participants included in the primary analyses

Highlighted here with A-D

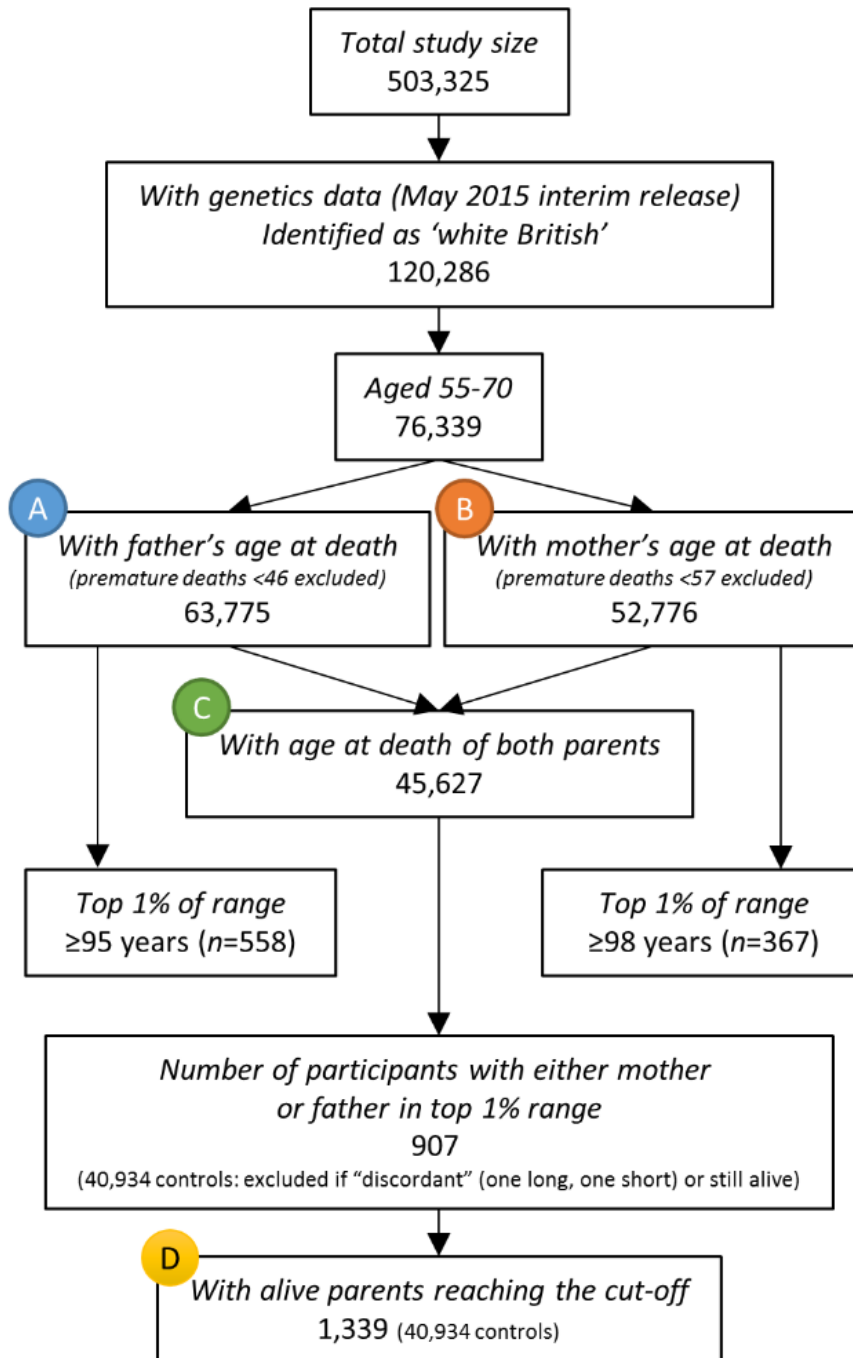

- A) Father's age at death,
- B) Mother's age at death,
- C) Combined parental age at death (z-scored),
- D) Binary phenotype: at least one parent attained the top 1% cut-off, derived from the mother's/father's ages at death

75,244 participants included in at least one analysis

2)

QQ plot for GWAS of father's age at death in 63,775 UK Biobank participants (9million imputed variants)

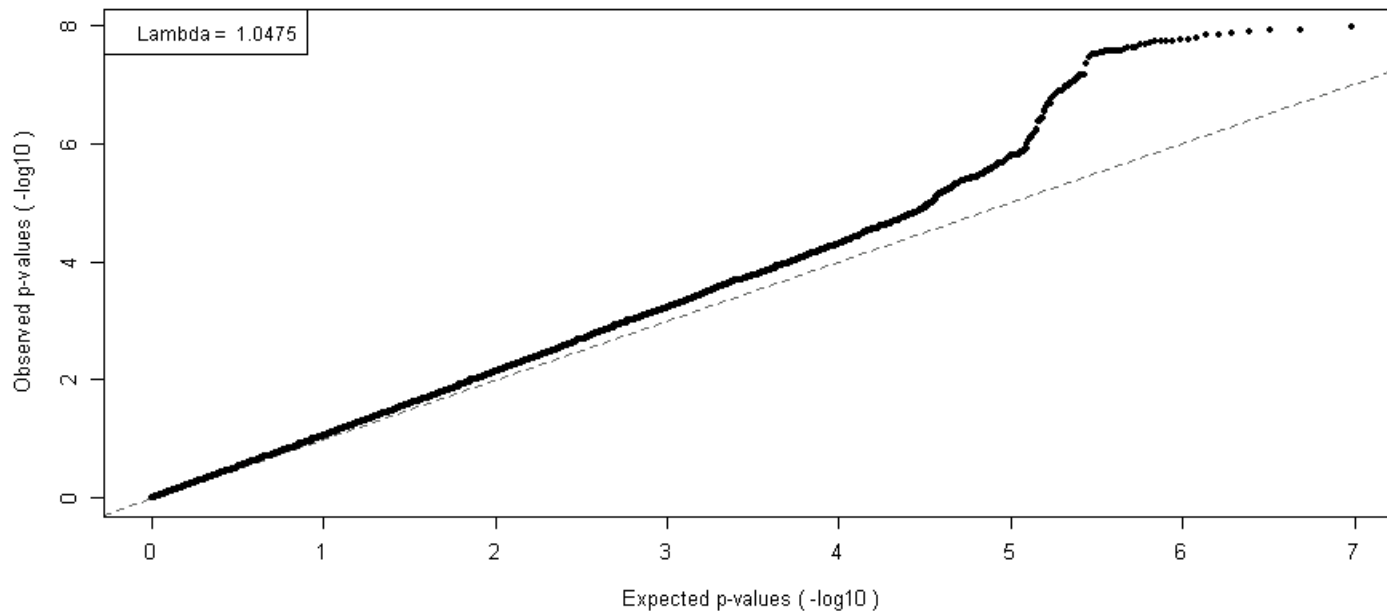

Manhattan plot of above data

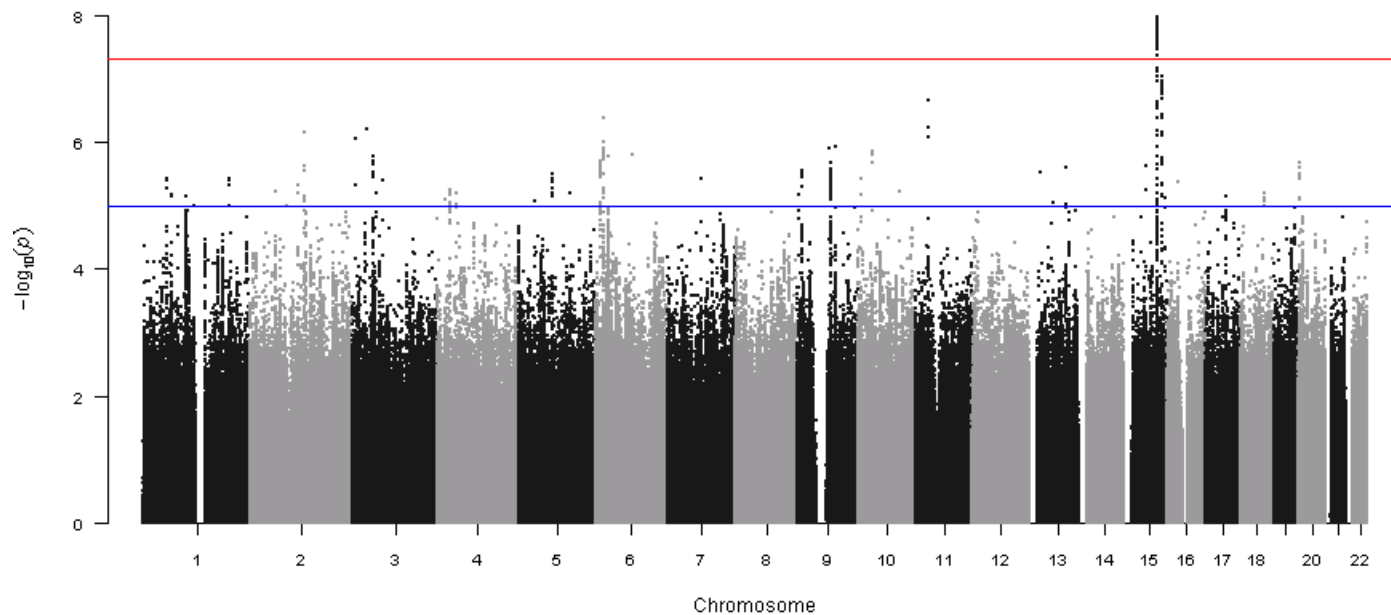

3) QQ plot for GWAS of mother's age at death in 52,776 UK Biobank participants (9million imputed variants)

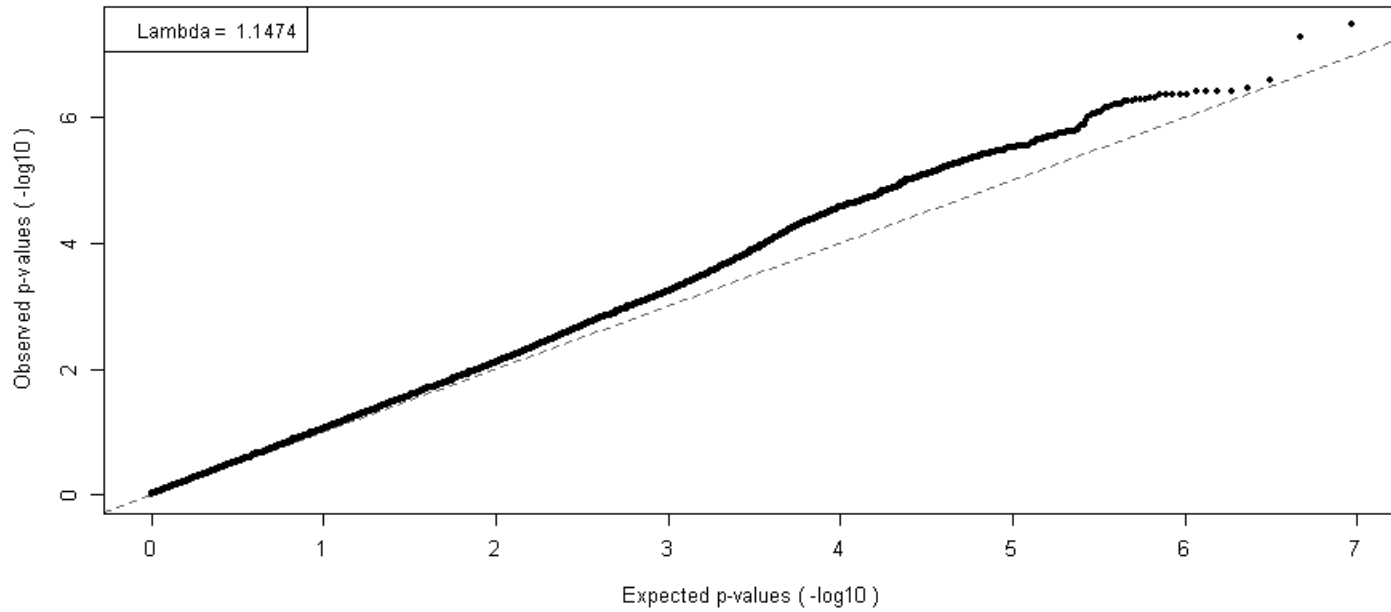

Manhattan plot of above data

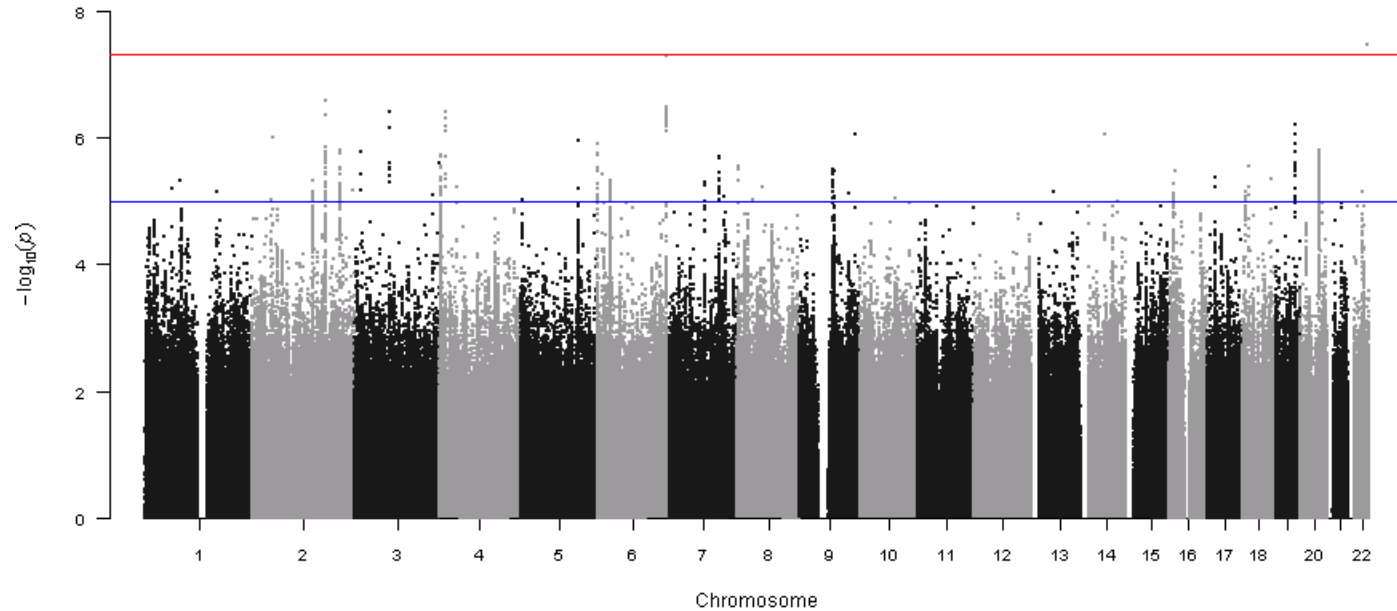

4) QQ plot for GWAS of combined parent's age at death in 45,627 UK Biobank participants (9million imputed variants)

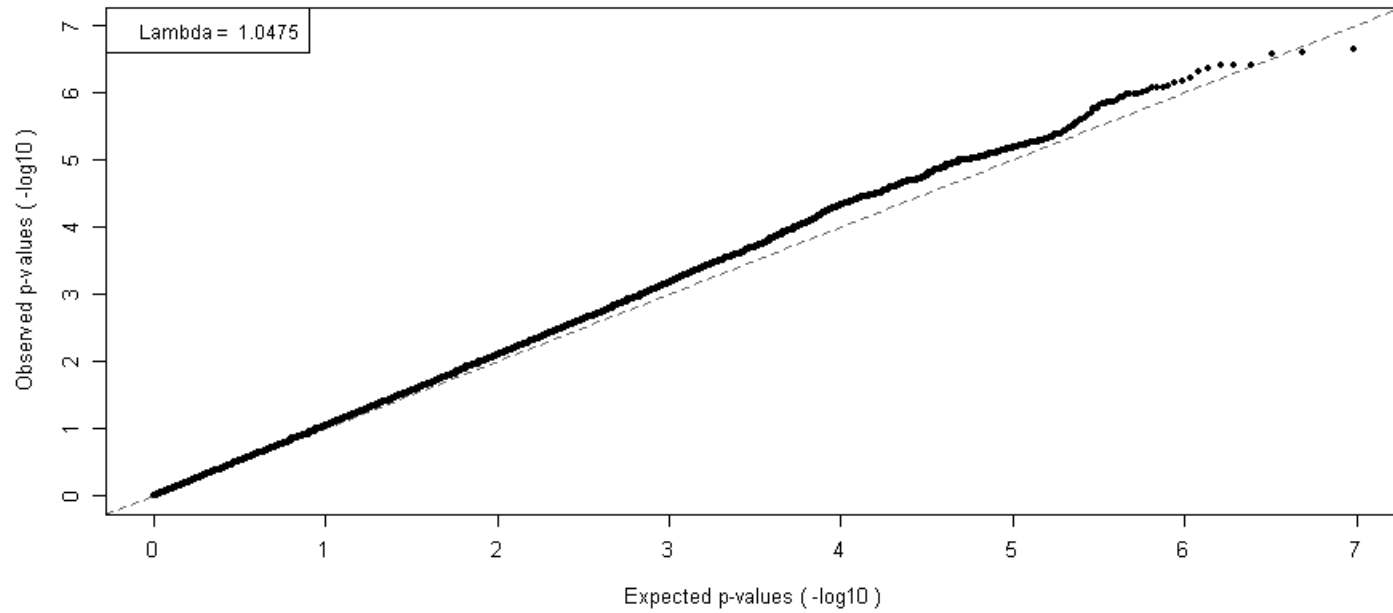

Manhattan plot of above data

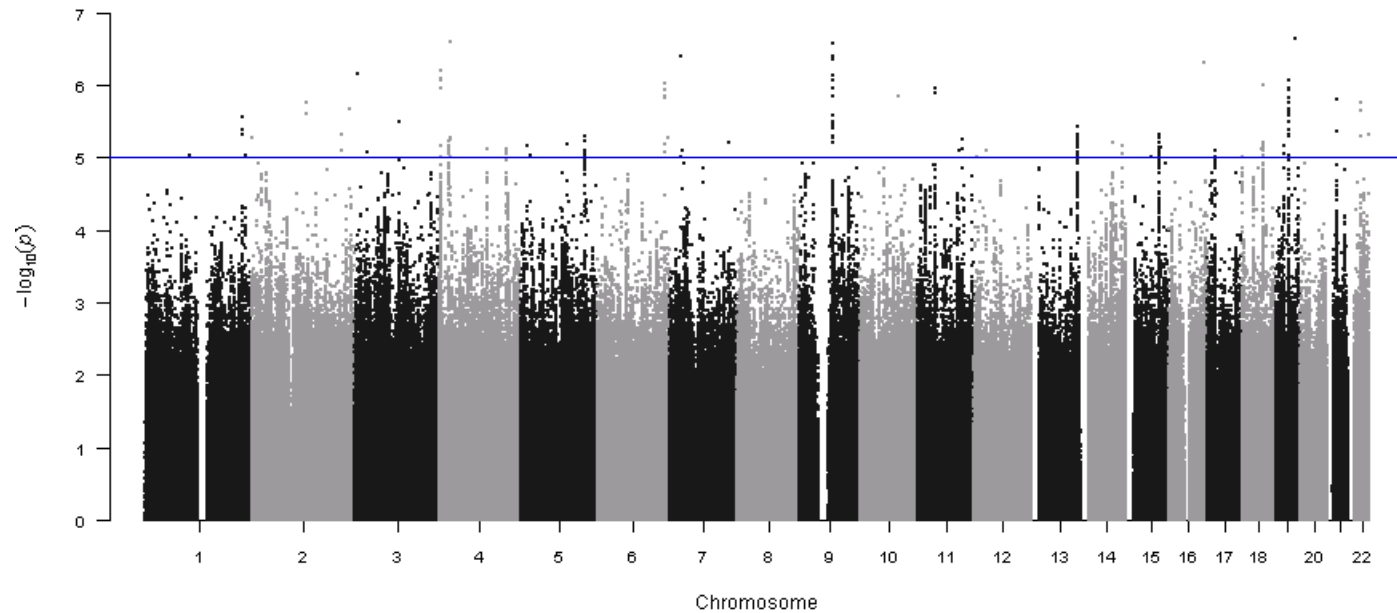

5) QQ plot for GWAS of “top 1% of age at death range” in 42,273 UK Biobank participants (9million imputed variants)

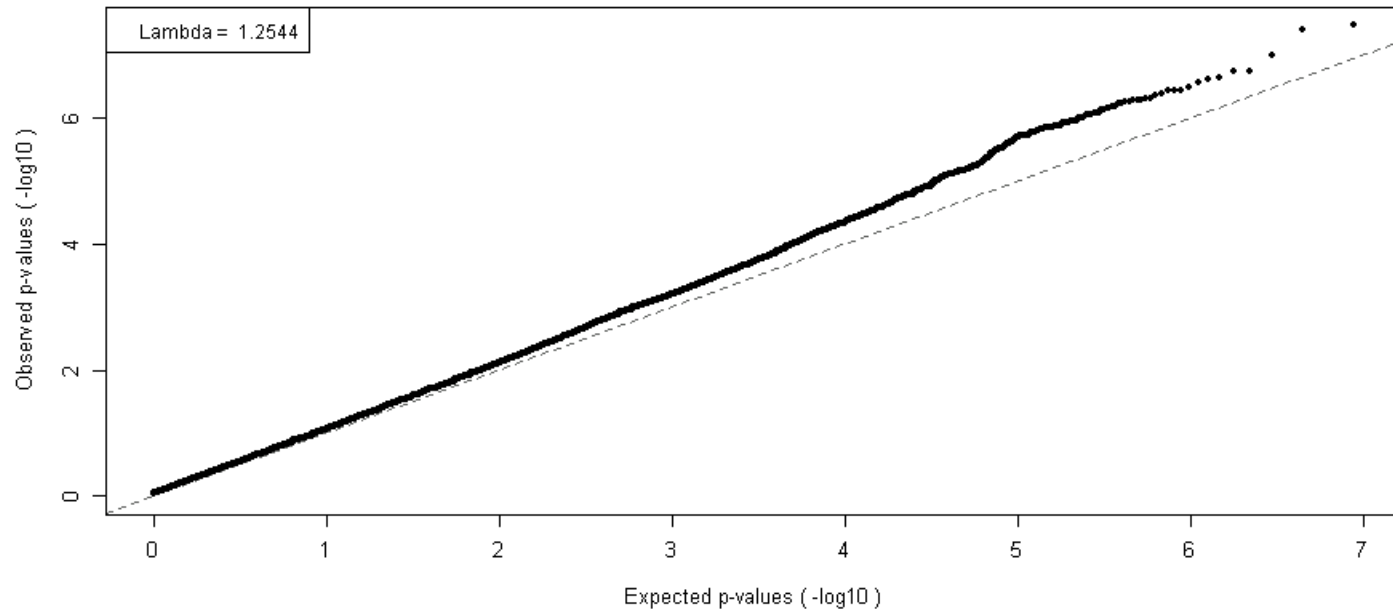

Manhattan plot of above data

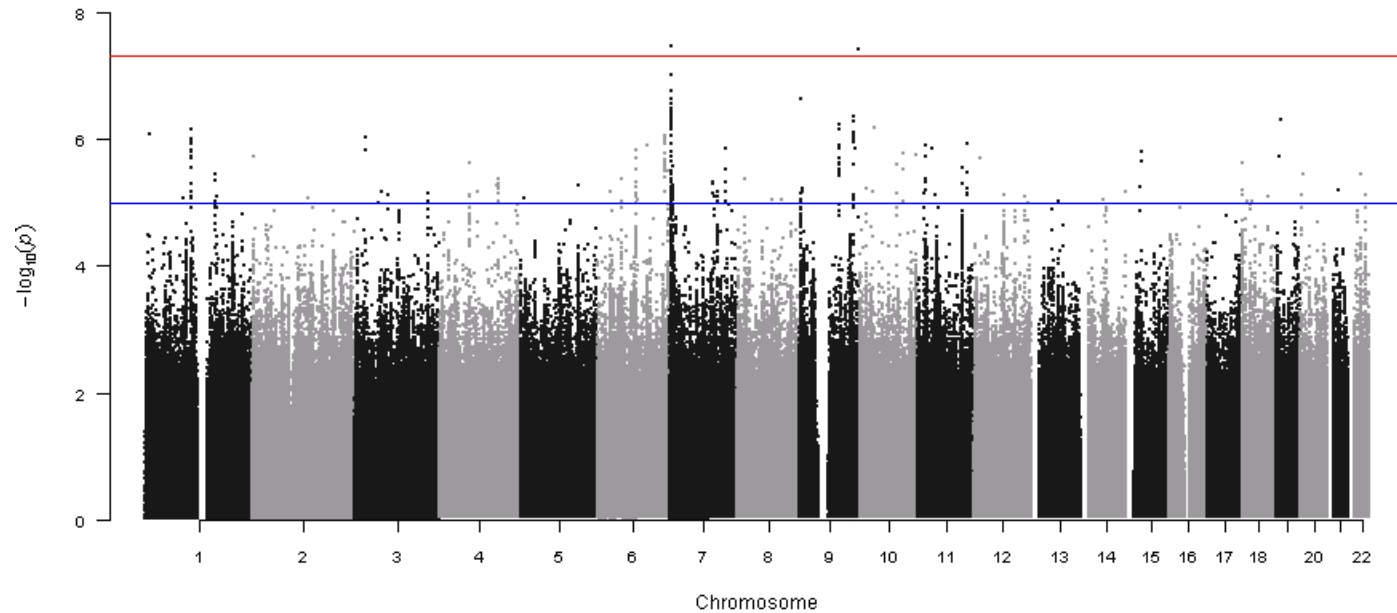

6) Locus Zoom plot displaying variants +/- 250kb around variant rs1051730  
P-values are the association with Father's age at death

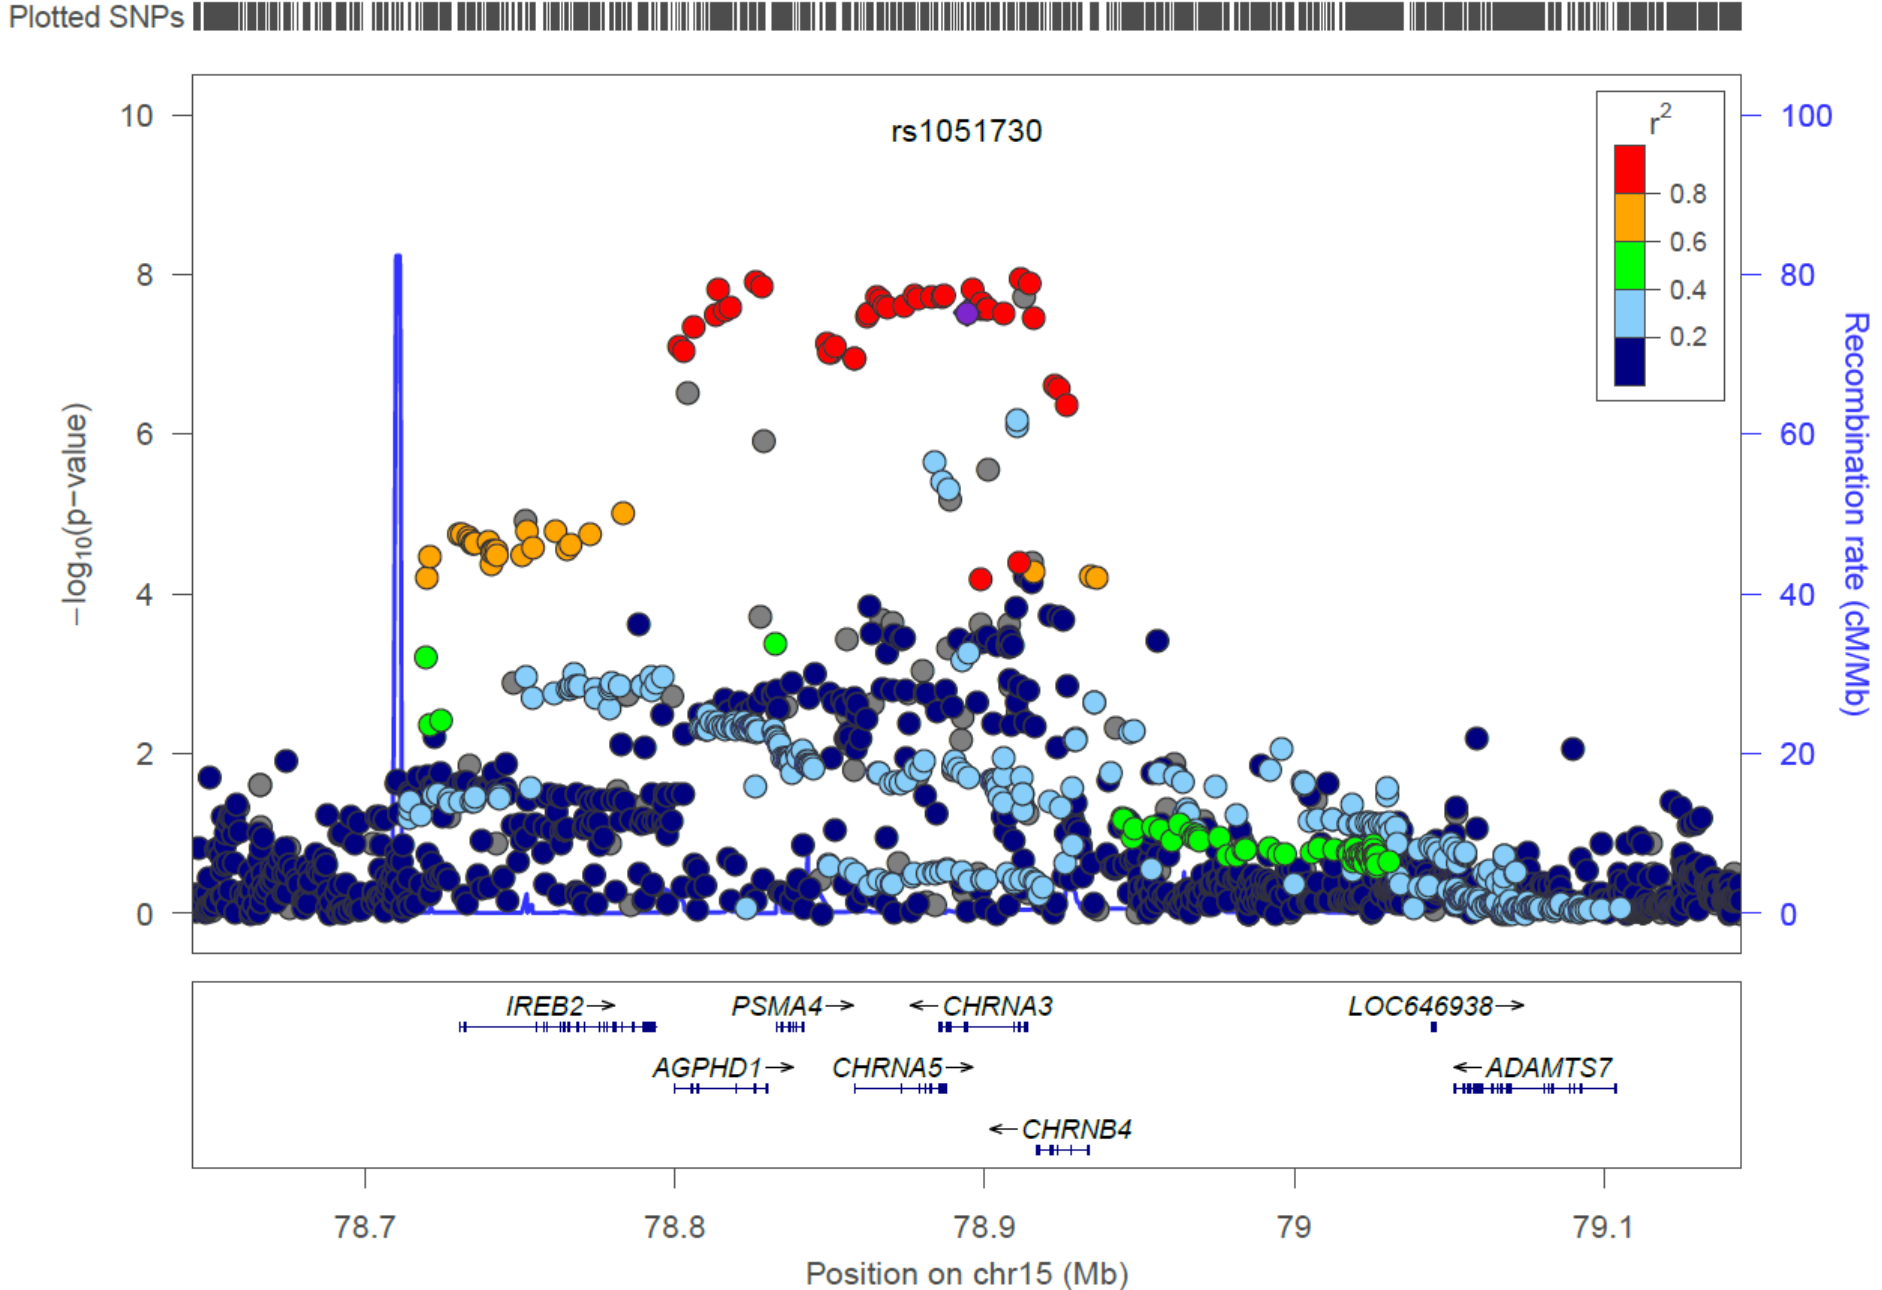

7) Locus Zoom plot displaying variants +/- 250kbp around variant rs62227724  
P-values are the association with Mother's age at death

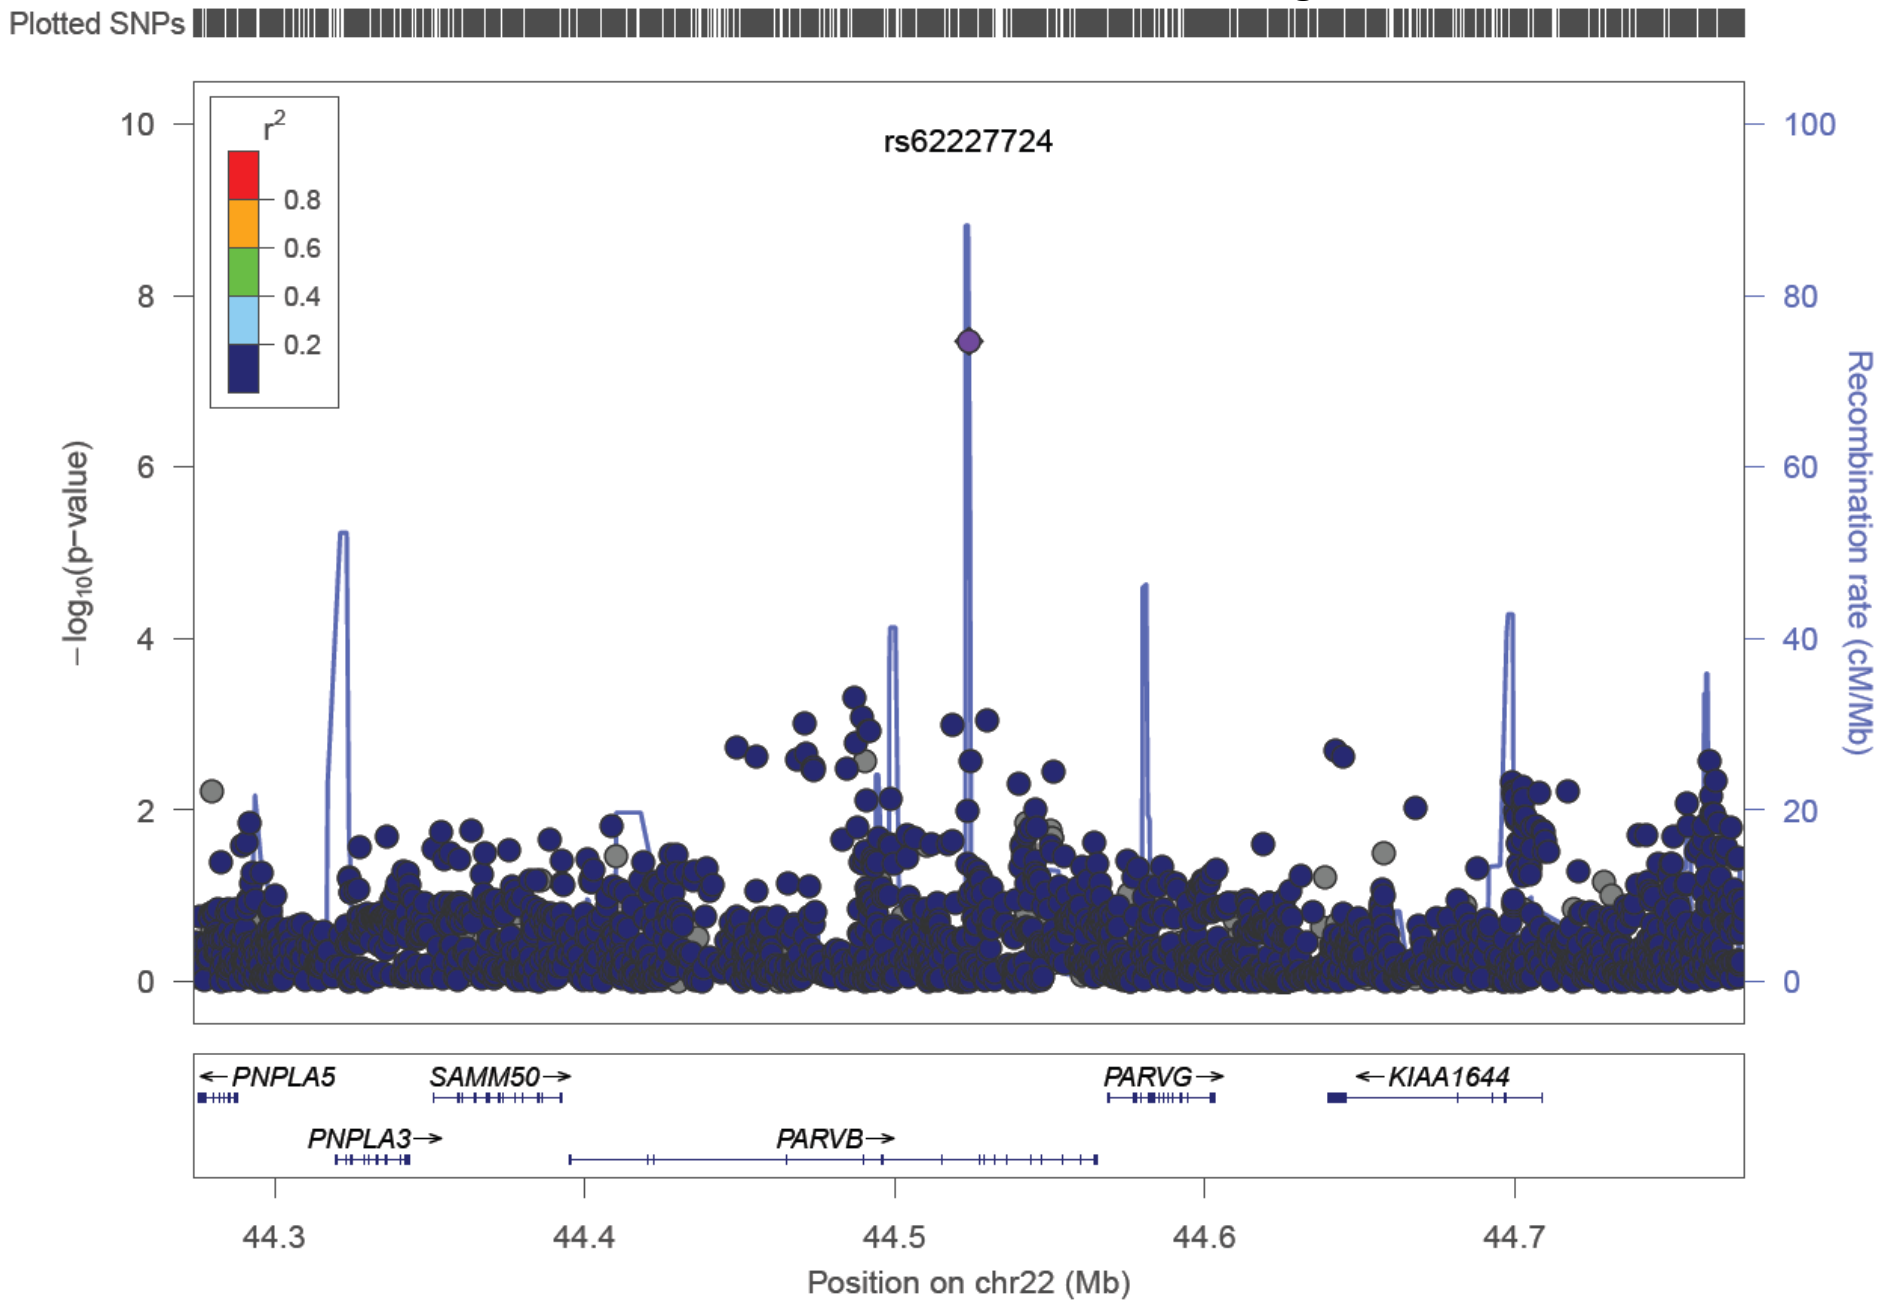

8) Locus Zoom plot displaying variants +/- 250kbp around variant rs75824829  
P-values are the association with "top 1% of age at death range"

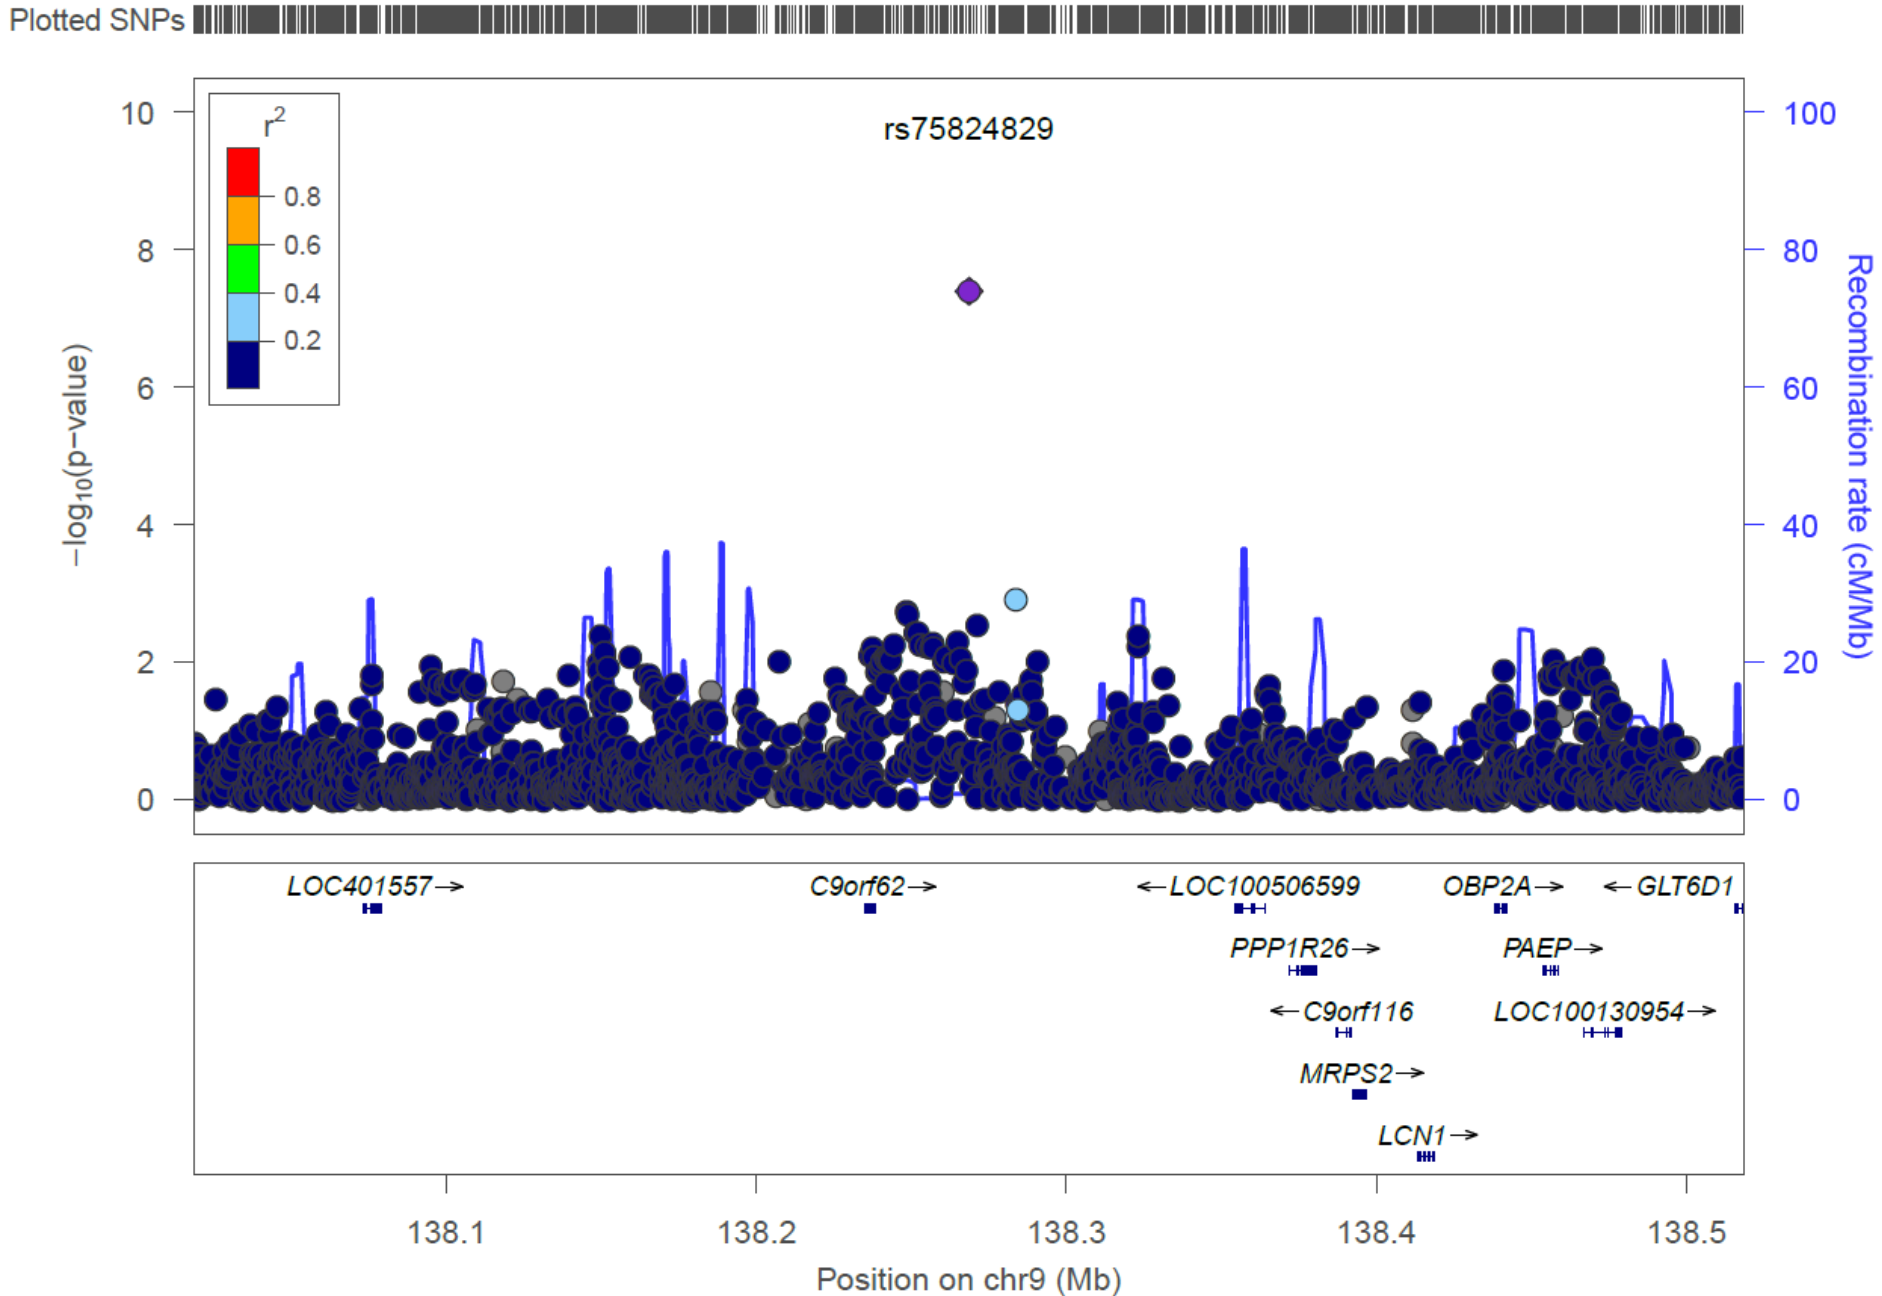



9)

## Locus Zoom plot displaying variants +/- 250kb around variant rs528161076

P-values are the association with "top 1% of age at death range"

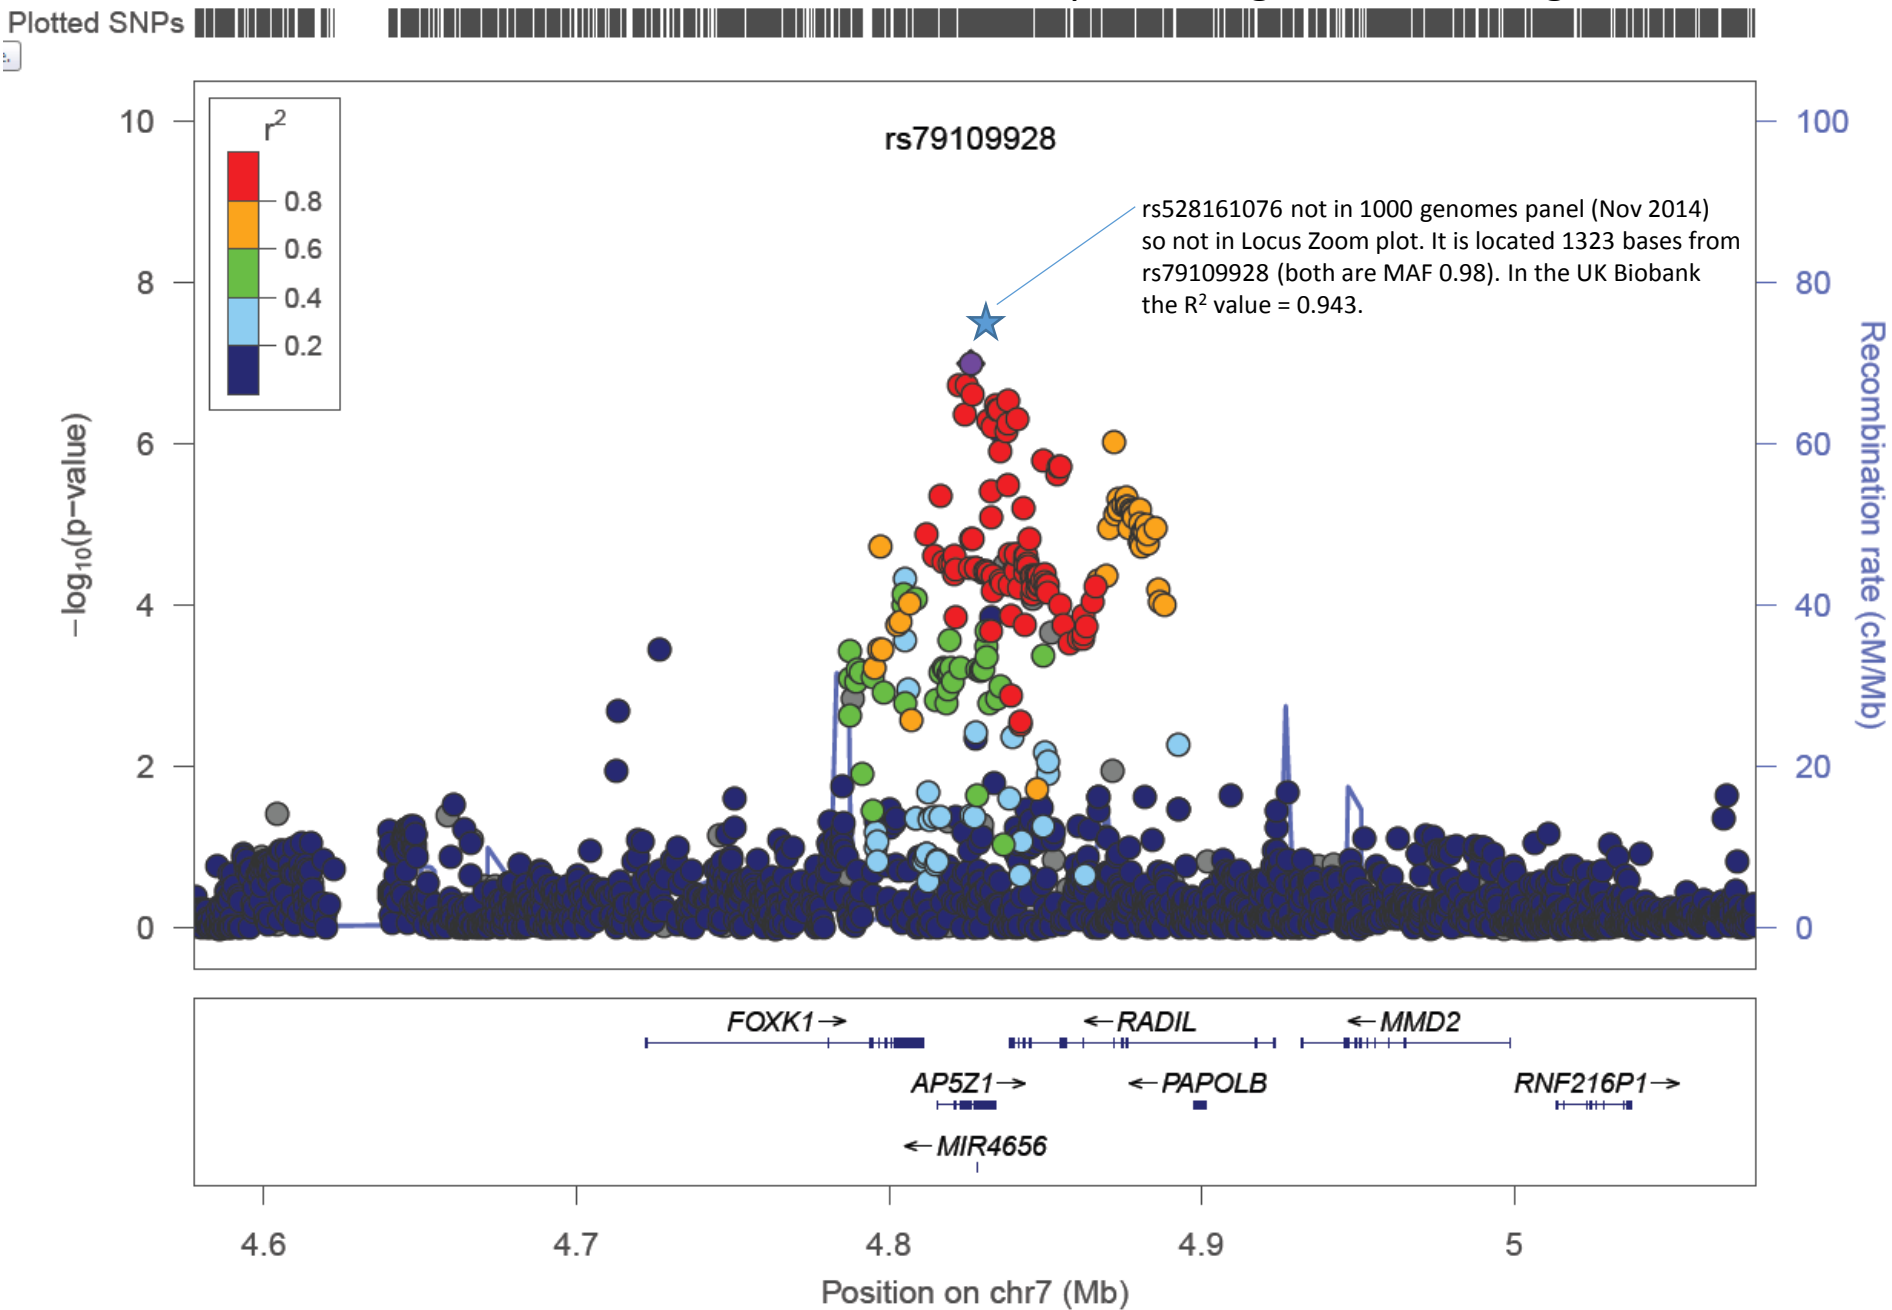

# 10) Comparing GRS associations with parental age-at-death phenotypes before/after exclusion of APOE variant rs4420638

## Parent's age-at-death (combined z-scores) (linear regression models)

| GRS (n SNPs)                               | Coef   | 95% CI           |
|--------------------------------------------|--------|------------------|
| Coronary Artery Disease (CAD) (42)         | -0.031 | -0.040 to -0.022 |
| Coronary Artery Disease (CAD) (42) no ApoE | -0.029 | -0.038 to -0.020 |
| Low Density Lipoprotein (49)               | -0.024 | -0.033 to -0.015 |
| Low Density Lipoprotein (49) no ApoE       | -0.018 | -0.027 to -0.009 |
| High Density Lipoprotein (67)              | 0.006  | -0.003 to 0.015  |
| High Density Lipoprotein (67) no ApoE      | 0.004  | -0.005 to 0.013  |
| Alzheimer's Disease (8)                    | -0.011 | -0.020 to -0.002 |
| Alzheimer's Disease (8) no ApoE            | 0.002  | -0.007 to 0.011  |

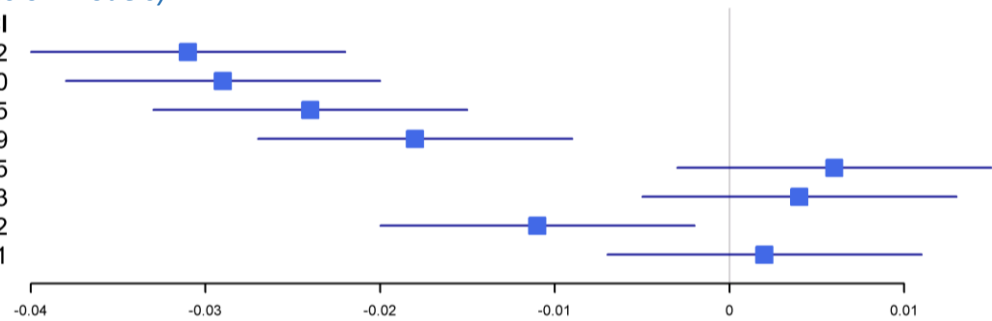

## Father's age-at-death (linear regression models)

| GRS (n SNPs)                               | Coef   | 95% CI           |
|--------------------------------------------|--------|------------------|
| Coronary Artery Disease (CAD) (42)         | -0.024 | -0.032 to -0.016 |
| Coronary Artery Disease (CAD) (42) no ApoE | -0.024 | -0.031 to -0.016 |
| Low Density Lipoprotein (49)               | -0.016 | -0.024 to -0.008 |
| Low Density Lipoprotein (49) no ApoE       | -0.016 | -0.023 to -0.008 |
| High Density Lipoprotein (67)              | 0.007  | -0.001 to 0.015  |
| High Density Lipoprotein (67) no ApoE      | 0.007  | -0.001 to 0.014  |
| Alzheimer's Disease (8)                    | 0.000  | -0.008 to 0.008  |
| Alzheimer's Disease (8) no ApoE            | 0.005  | -0.003 to 0.013  |

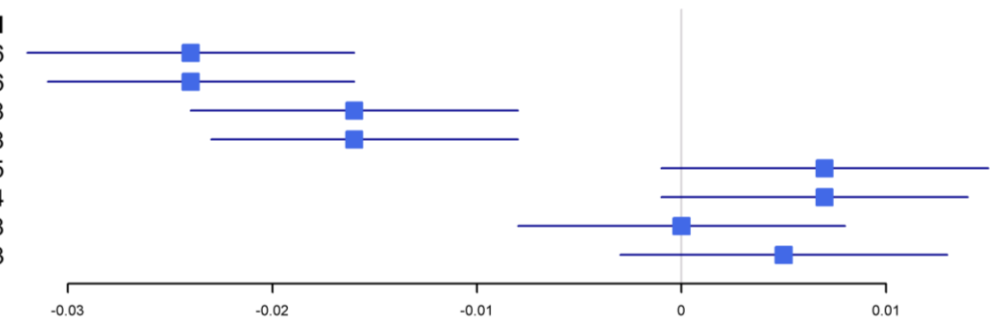

## Mother's age-at-death (linear regression models)

| GRS (n SNPs)                               | Coef   | 95% CI           |
|--------------------------------------------|--------|------------------|
| Coronary Artery Disease (CAD) (42)         | -0.020 | -0.028 to -0.011 |
| Coronary Artery Disease (CAD) (42) no ApoE | -0.017 | -0.026 to -0.009 |
| Low Density Lipoprotein (49)               | -0.011 | -0.019 to -0.002 |
| Low Density Lipoprotein (49) no ApoE       | -0.003 | -0.012 to 0.005  |
| High Density Lipoprotein (67)              | 0.003  | -0.006 to 0.011  |
| High Density Lipoprotein (67) no ApoE      | 0.000  | -0.008 to 0.008  |
| Alzheimer's Disease (8)                    | -0.015 | -0.024 to -0.007 |
| Alzheimer's Disease (8) no ApoE            | -0.003 | -0.012 to 0.005  |

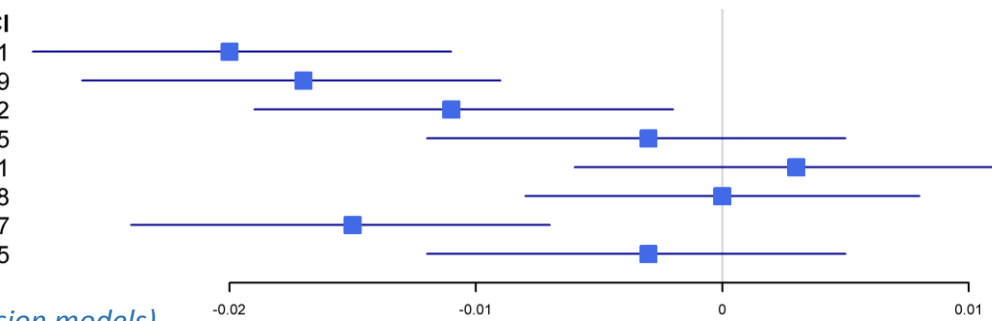

## At least one parent reached top 1% (logistic regression models)

| GRS (n SNPs)                               | OR    | 95% CI         |
|--------------------------------------------|-------|----------------|
| Coronary Artery Disease (CAD) (42)         | 0.883 | 0.836 to 0.933 |
| Coronary Artery Disease (CAD) (42) no ApoE | 0.875 | 0.821 to 0.932 |
| Low Density Lipoprotein (49)               | 0.892 | 0.844 to 0.942 |
| Low Density Lipoprotein (49) no ApoE       | 0.899 | 0.844 to 0.957 |
| High Density Lipoprotein (67)              | 1.080 | 1.022 to 1.140 |
| High Density Lipoprotein (67) no ApoE      | 1.073 | 1.008 to 1.142 |
| Alzheimer's Disease (8)                    | 0.941 | 0.890 to 0.995 |
| Alzheimer's Disease (8) no ApoE            | 1.033 | 0.970 to 1.100 |

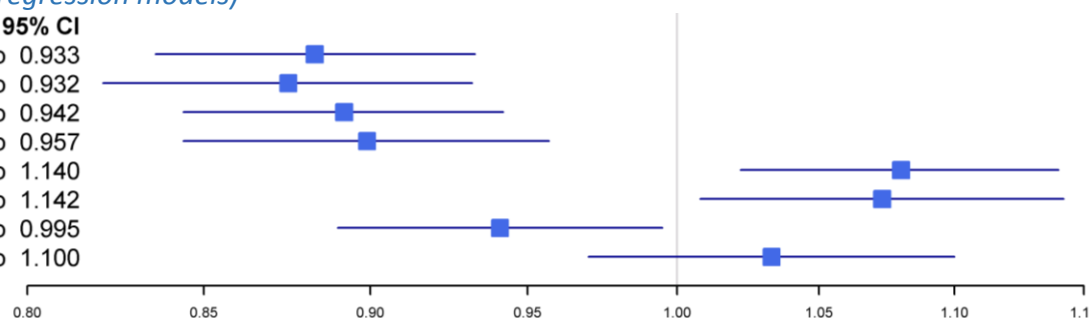

Supplement: aging-08-547-s002.pdf [file aging-08-547-s002.pdf]
